1                   **Blood vessel occlusion by *Cryptococcus neoformans* is a**  
2                   **mechanism for haemorrhagic dissemination of infection**

3    Josie F Gibson<sup>1,2</sup>, Aleksandra Bojarczuk<sup>1#</sup>, Robert J Evans<sup>1,#</sup> Alfred Kamuyango<sup>1</sup>, Richard  
4    Hotham<sup>1</sup>, Anne K Lagendijk<sup>3</sup>, Benjamin M Hogan<sup>3</sup>, Philip W Ingham<sup>2,4</sup>, Stephen A Renshaw<sup>1</sup>,  
5    Simon A Johnston<sup>1\*</sup>

6

7

8    1. Department of Infection, Immunity and Cardiovascular disease, Bateson Centre and Florey Institute, University  
9    of Sheffield, UK.

10   2. Institute of Molecular and Cell Biology, Agency of Science, Technology and Research (A-Star), Singapore

11   3. Division of Genomics of Development and Disease, Institute for Molecular Bioscience, University of

12   Queensland, Brisbane, Australia

13   4. Lee Kong Chian School of Medicine, Nanyang Technological University, Singapore.

14

15

16   # Joint second author

17

18

19

20

21

22

23

24 **Abstract**

25 Meningitis caused by infectious pathogens are associated with vessel damage and infarct  
26 formation, however the physiological cause is unknown. *Cryptococcus neoformans*, is a  
27 human fungal pathogen and causative agent of cryptococcal meningitis, where vascular  
28 events are observed in up to 30% of cases, predominantly in severe infection. Therefore, we  
29 aimed to investigate how infection may lead to vessel damage and associated pathogen  
30 dissemination using a zebrafish model for *in vivo* live imaging. We find that cryptococcal  
31 cells become trapped within the vasculature (dependent on their size) and proliferate there  
32 resulting in vasodilation. Localised cryptococcal growth, originating from a single or small  
33 number of cryptococcal cells in the vasculature was associated with sites of dissemination  
34 and simultaneously with loss of blood vessel integrity. Using a cell-cell junction tension  
35 reporter we identified dissemination from intact blood vessels and where vessel rupture  
36 occurred. Finally, we manipulated blood vessel stiffness via cell junctions and found  
37 increased stiffness resulted in increased dissemination. Therefore, global vascular  
38 vasodilation occurs following infection, resulting in increased vessel tension which  
39 subsequently increases dissemination events, representing a positive feedback loop. Thus,  
40 we identify a mechanism for blood vessel damage during cryptococcal infection that may  
41 represent a cause of vascular damage and cortical infarction more generally in infective  
42 meningitis.

43

44

45

46

47

48

## 49 **Introduction**

50 Life threatening systemic infection commonly results from tissue invasion requiring  
51 dissemination of microbes, usually via the blood stream. Blood vessel damage and blockage  
52 are commonly associated with blood infection, as exemplified by mycotic (infective)  
53 aneurisms or sub-arachnoid haemorrhage (1). Indeed, both bacterial and fungal meningitis  
54 are associated with vascular events including vasculitis, aneurisms and infarcts (1–5).

55 The mechanisms of dissemination to the brain in meningitis have been extensively studied *in*  
56 *vitro* and *in vivo*. Experimental studies suggest three potential mechanisms: passage of the  
57 pathogen between cells of the blood brain barrier, polarised endocytosis and exocytosis of  
58 the pathogen by brain vascular endothelial cells, and passage through the blood brain  
59 barrier inside immune cells. However, we hypothesised that blood vessel blockage and  
60 haemorrhagic dissemination might be an alternative mechanism.

61 *Cryptococcus neoformans* is an opportunistic fungal pathogen causing life threatening  
62 cryptococcal meningitis in severely immunocompromised patients. *C. neoformans* is a  
63 significant pathogen of HIV/AIDs positive individuals with cryptococcal meningitis ultimately  
64 responsible for 15% of all AIDS related deaths worldwide (6). *C. neoformans* has  
65 previously been suggested to disseminate from the blood stream into the brain through  
66 different routes, including transcytosis, and by using phagocytes as a Trojan horse (7–11).  
67 However, in support of our hypothesis a small number of clinical studies have suggested  
68 that blood vessel damage and bursting may also facilitate cryptococcal dissemination. Case  
69 reports indicate that cortical infarcts are secondary to cryptococcal meningitis, and suggest a  
70 mechanism whereby resulting inflammation may cause damage to blood vessels (12–14). In  
71 retrospective studies of human cryptococcal infection, instances of vascular events resulting  
72 in infarcts were seen in 30% of cases, predominantly within severe cases of cryptococcal  
73 meningitis (15).

74 There are two large challenges in understanding dissemination during infection that have  
75 limited mechanistic study. Firstly, the requirement for serial live imaging of a whole animal  
76 over hours or days. Secondly, the large variation in microbial pathogenesis and virulence  
77 including but not limited to hyphal invasion (3), haemolytic toxin production (16) and  
78 thrombosis (4). Long term *in vivo* analysis of infection is not possible in mammalian models;  
79 in zebrafish, by contrast, the ease of imaging infection enables visualisation of infection  
80 dynamics over many days (17,18). We observed cryptococcal cells becoming trapped and  
81 subsequently proliferating within the vasculature. Analysis of the dynamics of infection, via  
82 mixed infection of two fluorescent strains of *C. neoformans*, demonstrated that  
83 cryptococcomas within small blood vessels were responsible for overwhelming systemic  
84 infection. Localised expansion of *C. neoformans* was observed at sites of dissemination into  
85 surrounding tissue. Using a new VE-cadherin transgenic reporter line, we identified physical  
86 damage to the vasculature at sites of cryptococcal colonisation and found that blood vessels  
87 respond to their colonisation via expansion. Thus, our data demonstrate a previously  
88 uncharacterised mechanism of cryptococcal dissemination from the vasculature, through  
89 trapping, proliferation, localised blood vessel damage and through a global vasodilation  
90 response.

91

## 92 **Results**

### 93 **Individual cryptococcal cells arrest in blood vessels and form masses.**

94 Infection of zebrafish with a low dose of ~25 CFU of *C. neoformans*, directly into the  
95 bloodstream resulted in single cryptococcal cells arrested in the vasculature (Fig. 1A). We  
96 found that individual cryptococcal cells were almost exclusively trapped in the narrow inter-  
97 segmental and brain vessels, it is noteworthy that these vessels are similar in size to mouse  
98 brain blood vessels (Fig. 1B; (19,20)). Studies using intravital imaging in mice have  
99 previously noted cryptococcal cell trapping but due to the limitations of this model the effect

100 of this phenomenon on disease could not be established. Exploiting the unique capacity of  
101 zebrafish for long term, non-invasive *in vivo* imaging, we found that the sites of single or very  
102 small numbers of trapped cells progressed to form cryptococcal masses or cryptococcomas  
103 within blood vessels (Fig. 1C). We found no evidence of cryptococcomas movement along  
104 vessels once established and occlusion by cryptococcomas was sufficient to prevent  
105 passage of blood cells in blocked vessel (Fig. 1D). Cryptococcomas imaged with a  
106 cytoplasmic GFP marker did not make direct contact with the vessel wall, due to the  
107 presence of the cryptococcal polysaccharide capsule, visualised by antibody staining, which  
108 also enveloped large cryptococcal masses (Fig. 1E-G). Thus, we could demonstrate that  
109 single cryptococcal cells were trapped in blood vessels and appeared to proliferate to form  
110 cryptococcal masses encased in polysaccharide capsule.

111

112 **Clonal expansion of cryptococcal in small vessels results is associated with high**  
113 **fungal burden.**

114 Examination of infection dynamics over time revealed that cryptococcal masses were often  
115 present before overwhelming infection and death (Fig. 2A). This suggested to us that  
116 cryptococcoma formation might represent a population “bottle-neck”. Several bacterial  
117 pathogens have been demonstrated to establish disease via a population “bottle-neck” i.e.  
118 clonal expansion of an individual or small number of pathogens (21,22). Initially, we injected  
119 a 1:1 ratio of GFP and mCherry-labelled cryptococci and found that single colour infections  
120 were very rare. Therefore, we decided to use a skewed ratio so that we could better quantify  
121 the likelihood of a population “bottleneck” during the progression of cryptococcal infection.  
122 We injected 25cfu of a 5:1 ratio of GFP and mCherry-labelled cryptococci and followed the  
123 infections for up to 7days post infection (dpi). In 51.6% of all infected larvae, a high fungal  
124 burden end-point was demonstrated with either cryptococci observed in the larvae were  
125 predominantly GFP positive, predominantly mCherry positive cryptococci, or a mixed  
126 outcome of both GFP and mCherry positive cryptococci (Fig. 2B). In the remaining 48.4% of

127 infected larvae were overwhelmed by infection, or were able to clear infection so were not  
128 included in this study. Interestingly, a mixed final outcome group was not a rare occurrence  
129 (Fig. 2C). The high proportion of mixed GFP and mCherry overwhelming infections  
130 demonstrated that a single cryptococcal cell was highly unlikely to give rise to the final  
131 infection population. The predominantly GFP positive outcome group was observed most  
132 often, but only for 56.25% of all endpoints. This was far lower than would be expected, given  
133 the initial 5:1 ratio of differently labelled cells injected. While a 5:1 ratio of GFP:mCherry was  
134 injected into each larva, the actual number and ratio of cryptococcal cells varied between  
135 individual fish (Fig. 2D, SFig 1). When single colour and mixed outcomes were compared  
136 there was no significant difference in the injected ratio (Fig. 2E). However, correlative  
137 analysis demonstrated that there was no relationship between the initial ratio and final  
138 outcome ratio, suggesting there were occurrences of clonal expansion during infection (Fig.  
139 2F). Therefore, it appeared that, while a population “bottleneck” was not common in the  
140 progression of uncontrolled cryptococcal infection, there was a skewing in the cryptococci  
141 that contributed to the final population. We hypothesized that this skewing was determined  
142 by the clonal expansion of cryptococcal masses within blood vessels. To test this  
143 hypothesis, we analysed the colours of cryptococcal masses following infection with a 1:1  
144 ratio of GFP and mCherry-labelled cryptococci and we found that masses were of a single  
145 colour in 14/15 infections 3 dpi. This suggests that skewing of the cryptococcal population  
146 within the fish occurs at the cryptococcoma stage of infection before the final infection  
147 outcome.

148 Cryptococcal masses were observed in every case preceding disseminated infection by an  
149 average of 2 days (Fig. 3A) and the number of cryptococcal masses was correlated with the  
150 rate of infection progression (Fig. 3B). We had found that individual cryptococcal cells  
151 became trapped in the narrow inter-segmental vessels (ISVs) and brain vessels, similar in  
152 size to those identified in blood vessels in the mouse brain (Fig. 1A). We quantified the  
153 distribution of cryptococcomas and found that most (80.3%) were located in these smaller

154 brain and inter-segmental blood vessels (Fig. 1B). As cryptococcal mass formation at the  
155 start of infection was observed in the smaller blood vessels, we determined whether clonal  
156 expansion was favoured in smaller blood vessels later in infection. We compared the ratio of  
157 GFP:mCherry between the trunk blood vessels and the caudal vein and found that in mixed  
158 infections there were single colour masses in the trunk vessels but dual colours in the larger  
159 caudal vein (Fig. 2A; Fig. 3C) suggesting cryptococcal expansion occurs at sites of trapping  
160 in narrow blood vessels. Finally, to establish a role of cryptococcal masses in determining  
161 the population of cryptococci that contributed to high fungal burden, we compared the  
162 colours of individual cryptococcal masses with majority colour of high fungal burdens within  
163 individual fish. A clear relationship was demonstrated between each colour of cryptococcal  
164 masses and the disseminated infection; a single (GFP or mCherry) cryptococcal mass  
165 colour was significantly more likely to result in a single colour final outcome, with a  
166 corresponding finding for mixed cryptococcomas (Fig. 3D, E  $p < 0.01$ ). Together these  
167 observations suggested cryptococcal cells became trapped in small blood vessels followed  
168 by localised clonal expansion and a “skewing” of the cryptococcal population.

169

#### 170 **Cryptococcal masses cause local and peripheral vasodilation.**

171 The finding that cryptococcal masses blocked blood vessels prompted us to measure blood  
172 vessel width at sites with or without cryptococcomas. We found that blood vessels that  
173 contained cryptococcal cells were significantly wider than those devoid of cryptococcal cells  
174 in the same infections (Fig 4A, B). A higher infection dose was used to increase the number  
175 of cryptococcal masses that formed. There was a significant difference very early, at 2 hours  
176 post infection (hpi), and a much larger difference at 3dpi (Fig. 4A, B), suggesting to us an  
177 immediate passive physical effect (i.e. due to the elasticity of the vessel wall) and a slower  
178 physical widening of the vessel caused by cryptococcal growth. We tested the first  
179 hypothesis of a fast response of the blood vessel by live imaging small brain vessels and  
180 observed that vessels locally dilated shortly after blockages formed (Fig 4C). The increase in

181 vessel width was proportional to the size of the cryptococcal mass inside the vessel at both  
182 2hpi and 3dpi (Fig. 4D, E) suggesting a slow increase in vessel width due to growth of the  
183 cryptococcal mass pushing against the vessel wall. Injection of inert beads of a  
184 corresponding average cryptococcal cell size (4.5 $\mu$ m) did not lead to formation of large  
185 masses, although there was a small but significant increase in vessel size at locations where  
186 beads did become trapped in the vasculature by 3dpi (Fig. 4F). Additionally, beads were  
187 observed stuck in the inter-segmental blood vessels much less frequently than live  
188 cryptococcal cells, with 13.6% of blood vessels containing beads compared to 89.0%  
189 containing cryptococcal cells. In addition, we specifically imaged the small vessels of the  
190 brain and found that infected blood vessels were larger relative to blood vessels in the same  
191 location in control animals (Fig. 4G, H). Thus, it appeared that blockage by cryptococcal  
192 cells and masses increased vessel diameter due to active and passive changes in blood  
193 vessels to reduce the total peripheral resistance. This appears similar to the role of  
194 increased peripheral resistance and vessel tension in higher frequencies of aneurysm (23)

195

#### 196 **Increased cryptococcal cells size increase frequency of blood vessel occlusion**

197 In order to investigate whether cryptococcal cell size or rigidity may affect the frequency of  
198 trapping and the extent of blood vessel vasodilation, we used mutant cryptococci with  
199 altered physical properties. Recently, the biophysical properties of several ceramide  
200 pathway mutants have been described (24) in which the accumulation of saturated GluCer  
201 ( $\Delta$ *sld8*) was suggested to increase the rigidity of cryptococcal membranes and therefore  
202 reduce their ability to traverse smaller blood vessels. In contrast, mutants in  $\Delta$ *gcs1* and  
203  $\Delta$ *smt1* have reduced amounts of the more rigid ceramide lipids or differences in lipid packing  
204 respectively. Therefore, we predicted that the  $\Delta$ *sld8* mutant would produce an increased  
205 number of blocked vessels whereas the  $\Delta$ *gcs1* and  $\Delta$ *smt1* might produce reduced numbers  
206 of blockages. However, we found no differences in the number of blocked vessels or vessel  
207 width in either  $\Delta$ *gcs1*,  $\Delta$ *smt1* or  $\Delta$ *sld8* compared to their reconstituted strains (SFig 2-4).



208 Next, we asked whether fungal cell sized altered blockage and dilation of blood vessels.  
209 Deletion of  $\Delta plb1$  has previously been shown to exhibit increased cell size during infection of  
210 macrophages *in vitro* and in a mouse model of cryptococcosis (25,26). We have recently  
211 demonstrated that several phenotypes associated with  $plb1$  deletion were due to differences  
212 in fungal eicosanoid production, differences also present in a second cryptococcal mutant  
213 strain  $lac1$  (27). We first wanted to ensure enlarged cryptococcal size also occurs in the  
214 zebrafish infection model; we measured the size of  $\Delta plb1$  and  $\Delta lac1$  cryptococcal cells at  
215 1dpi, and found that there was a significant increase in cell diameter compared to wild type,  
216 with a 100% increase in the number of cryptococci with a diameter  $>5\mu\text{m}$  (Fig. 5A). As  
217 human, rodent and zebrafish capillaries are close to  $5\mu\text{m}$  at their smallest, we hypothesized  
218 that the increased fungal cell diameter of the  $\Delta plb1$  and  $\Delta lac1$  mutant cells would increase  
219 the number of vessels that would be blocked by cryptococci.

220 We counted the number of blocked vessels in infections with wild type,  $\Delta plb1$  and  $\Delta lac1$   
221 mutant cryptococci and found there was a large increase in the proportion of blocked  
222 vessels at 1dpi, in some cases more than 80% of inter-segmental vessels were blocked by  
223 the  $\Delta plb1$  and  $\Delta lac1$  mutant cells (Fig. 5B). The difference in the proportion of blocked  
224 vessels was no longer significant by 3dpi (Fig 5C). We also measured the width of vessels  
225 but found no difference at either 1 or 3dpi between wild-type or mutant strains. Therefore,  
226 increased cryptococcal cell diameter led to an increase in the frequency of vessel blockages  
227 but did not significantly influence the size of cryptococcal masses, which were predominantly  
228 determined by proliferation of masses rather than individual cell size (Fig. 5D, E).

229

### 230 **Cryptococcal infection increases blood vessel tension resulting in hemorrhagic** 231 **dissemination**

232 Following long-term time lapse imaging of cryptococcal masses we observed that  
233 enlargement of the cryptococcoma over time eventually led to invasion of the surrounding

234 tissue at the site of infection (Fig. 1C). The mechanism by which cryptococci disseminate  
235 from blood vessels is unknown but has been suggested to be via transcytosis or within  
236 immune cells *in vitro* (7–11). However, from our observations and from clinical reports, we  
237 hypothesised that cryptococcomas were blocking vessels, increasing the force on the blood  
238 vessel walls, leading to vessel rupture and dissemination of cryptococci. To test our  
239 hypothesis, we first established the association between tissue invasion and sites of clonal  
240 expansion within the vasculature. We found that in all cases tissue invasion occurred at sites  
241 of clonal expansion within the vasculature (19/19 tissue invasion events observed from 29  
242 infected zebrafish; Fig 6A). Furthermore, *C. neoformans* that had invaded the surrounding  
243 tissue were invariably the same colour (GFP or mCherry) as the closest vasculature  
244 cryptococcoma (Fisher's exact test  $p < 0.001$ ,  $n = 3$ , Fig. 6B). To determine whether the  
245 vasculature was physically damaged sufficiently for cryptococcal cells to escape into the  
246 surrounding tissue, we examined blood vessels at high resolution at the sites of tissue  
247 invasion. We observed vessel damage and bursting at locations of cryptococcomas (Fig. 6C,  
248 D), in addition to tissue invasion events where the vasculature remained intact (Fig. 6C, 6E)  
249 but never in non-infected vessels (Fig. 6F). We could also identify possible transit by  
250 macrophages but we were unable to capture these events at sufficient time resolution to be  
251 conclusive. Blood vessel integrity is maintained by individual cell integrity and the cell-cell  
252 junctions between vascular endothelial cells. To investigate vessel integrity, through  
253 visualisation of fluorescent vessel markers, we used a stable cross of two zebrafish  
254 transgenic lines *Tg(10xUAS:Teal)uq13bh* and the endothelial *TgBAC(ve-cad:GALFF*  
255 *(28)* driver to fluorescently label vascular endothelial cell junctional protein VE cadherin (23)  
256 in addition to the blood vessel reporter line. Using this transgenic, we also found that  
257 cryptococcal cells were located outside the blood vessel when vessels were either intact  
258 (Fig. 6E) or disrupted (Fig. 6G), in comparison to non-infected vessels (Fig. 6H).

259 We measured VE-cadherin intra-molecular tension at cell-cell junctions between vascular  
260 endothelial cells using our FRET reporter, the zebrafish transgenic line *TgBAC(ve-cad:ve-*

261 *cadTS* *uq11bh* (hereafter VE-cadherin-TS) (23) and found a clear decrease in VE-cadherin  
262 expression (Fig. 7A-C). In addition, we found that the VE-cadherin expression at junctions  
263 were decreased in both vessels with cryptococcal masses and those without, supporting our  
264 previous data demonstrating a global vasodilation in response to increased peripheral  
265 resistance (Fig. 7C). These, data suggested that there was an increase in vessel tension  
266 associated with cryptococcal growth in vessels and it has recently been shown that  
267 aneurysms have a higher chance of rupture under high vessel tension and peripheral  
268 resistance (23). Therefore, to test if the increased peripheral resistance was causing the  
269 haemorrhagic dissemination we had observed, we sought to increase peripheral resistance  
270 and vessel stiffness simultaneously by inhibiting the elasticity of blocked vessels. VE-  
271 cadherin is regulated extracellularly by the protease ADAM10 and inhibition of ADAM10  
272 increases VE-cadherin junctions and blood vessel stiffness (29). Therefore, we used an  
273 ADAM 10 inhibitor during infection to increase peripheral resistance and vessel stiffness  
274 simultaneously by inhibition the elasticity of blocked vessels. In agreement with our  
275 prediction we found that inhibition of ADAM10 was sufficient to cause a large increase in the  
276 number of haemorrhagic dissemination events (Fig. 7D).

277

## 278 **Discussion**

279 Here we have demonstrated how *C. neoformans* can cause haemorrhagic dissemination  
280 from blood vessels, suggesting a generalised mechanism for infarct formation during  
281 infective meningitis. Consistent with post-mortem reports showing pathogens in the brain  
282 located next to capillaries with fungal or bacterial masses present (30), our data demonstrate  
283 that, even at very low levels of fungemia, cryptococci can form masses in blood vessels,  
284 leading to increased vessel tension and blood vessel haemorrhage.

285 We show both localised vessel and a global vasodilation response during infection.  
286 Localised vessel vasodilation and associated damage is caused by pathogen proliferation;

287 however the global response is likely caused by an increase in the peripheral resistance. We  
288 demonstrate that proliferation of trapped fungal cells leads to skewing of the fungal  
289 population. Importantly, we demonstrate vessel damage occurs at sites of cryptococcal  
290 masses, which likely leads to cryptococcal escape to the surrounding tissue. However, we  
291 observed dissemination via transcytosis (demonstrated where vessel structure was still  
292 intact) at sites of cryptococcomas which is suggestive that transcytosis events are also  
293 promoted by the presence of large masses of cryptococcal cells. This implicates  
294 cryptococcal growth within blood vessels in facilitating dissemination events, not only  
295 through vasculature damage.

296 Furthermore, we demonstrate that following cryptococcal infection a global increase in  
297 vessel vasodilation and tension across VE-cadherin occurs within the larvae, likely due to  
298 increased blood flow. We suggest increased blood flow, and therefore likely increased  
299 vessel tension, (supported with increased tension in VE-cadherin molecules) progress a  
300 positive feedback loop of increased blockages leading to further increased blood flow, vessel  
301 tension and ultimately dissemination. Indeed, we demonstrate that increasing vessel  
302 stiffness leads to increased dissemination events. This may be similar to the observed  
303 increased risk of aneurysm with high vessel tension and peripheral resistance without  
304 infection (23), perhaps further enhanced as infection progresses. Interestingly, in bacterial  
305 meningitis local damage occurs to vascular endothelial cells, but also an imbalance of  
306 hemostatic forces, potentially caused by multiple immune responses to infection, may have  
307 a systemic effect as we have shown here (31), suggesting that blood flow and vessel tension  
308 are important factors in multiple vascular infections and diseases.

309 The mechanism of haemorrhagic dissemination we have described for *C. neoformans* may  
310 be relevant to many infections, with multiple pathogens known to cause infarcts and  
311 vasculitis in human infection (32,33). A case report of *Candida krusei* infection in a leg ulcer  
312 causing localised vasculitis (32) suggests that local fungal pathogen growth can damage the  
313 vasculature, although this may be due to hyphal growth. In addition, infarcts are also

314 observed in meningitis caused by bacterial pathogens, for example *S. enterica* and *T.*  
315 *bacillus* (34,35). Tuberculosis meningitis can also cause vasculitis leading to infarct  
316 formation (2). In bacterial meningitis, caused by *N. meningitidis*, the level of bacteraemia  
317 causes different types of vascular damage. At low bacterial numbers, bacteria are able to  
318 colonise brain blood vessels and cause limited vessel damage, eventually leading to  
319 meningitis. In contrast, high bacterial load is associated with increased vascular colonisation  
320 and augmented vascular damage (1), indicating that higher blood vessel blockage can  
321 cause increased blood vessel damage, perhaps in a similar positive feedback loop as we  
322 suggest for cryptococcal meningitis. The mechanism of vessel damage and haemorrhage  
323 may differ between species, for example *Candida albicans* infection caused haemorrhage by  
324 directly invading the blood vessel wall (5). Another aspect is the virulence factors used by  
325 the invading pathogen. In bacterial meningitis caused by virulent bacteria, *Staphylococcus*  
326 *aureus*, haemorrhage was observed, whereas avirulent bacteria, viridans streptococci,  
327 caused only limited blood vessel damage (16).

328 Vascular damage following fungal infection may not be limited to *C. neoformans*, *Aspergillus*  
329 *fumigatus* clinical reports show invasion of blood vessels could lead to hemorrhagic infarct  
330 formation (3) and in meningitis caused by *Coccidioides immitis*, infarcts were observed, at  
331 locations of thrombosis (4), potentially caused by fungal cell blockage of vessels.  
332 Furthermore, haemorrhage has been observed following an aneurysm caused by *Mucor*  
333 infection in an immuno-compromised patient with primary mucormycosis (36). Similarly,  
334 mycotic aneurysm, vasculitis and also blood vessel occlusion were observed in zygomycosis  
335 infection (37), suggesting a trapping of fungal cells and blood vessel damage may occur in  
336 different fungal species infection.

337 Thus, the novel mechanism of cryptococcal dissemination that we have demonstrated may  
338 be the physiological cause of infarcts observed in during blood infection. Pathogen cell  
339 trapping in narrow blood vessels, based on size, leads to localised proliferation. Growth  
340 leads to blood vessel vasodilation and damage which can allow cryptococcal cell escape

341 into the surrounding area. In addition, cryptococcal infection induces a global vasodilation  
342 response which is associated with increased vessel tension and dissemination events. Our  
343 proposed mechanism for blood vessel bursting in cryptococcal infection may exist for other  
344 pathogens which cause vascular damage or haemorrhages, and vary depending on  
345 individual pathogen traits.

346

#### 347 **Methods and Methods:**

348 Ethics statement

349 Animal work was carried out according to guidelines and legislation set out in UK law in  
350 the Animals (Scientific Procedures) Act 1986, under Project License PPL 40/3574 or  
351 P1A4A7A5E). Ethical approval was granted by the University of Sheffield Local Ethical  
352 Review Panel. Animal work completed in Singapore was completed under the Institutional  
353 Animal Care and Use Committee (IACUC) guidelines, under the A\*STAR Biological  
354 Resource Centre (BRC) approved IACUC Protocol # 140977.

355 Fish husbandry

356 Zebrafish strains were maintained according to standard protocols (38). Animals housed  
357 in the Bateson Centre aquaria at the University of Sheffield, adult fish were maintained on  
358 a 14:10-hour light/dark cycle at 28°C in UK Home Office approved facilities. For animals  
359 housed in IMCB, Singapore, adult fish were maintained on a 14:10-hour light/dark cycle at  
360 28°C in the IMCB zebrafish facility. We used the *AB* and *Nacre* strains as the wild-type  
361 larvae. The blood vessel marker *Tg(kdrl:mCherry)s916*, in addition to  
362 *Tg(10xUAS:Teal)uq13bh* (23) crossed to endothelial *TgBAC(ve-cad:GALFF)(28)* for  
363 stable expression. We also used the vascular-cadherin marker line *TgBAC(ve-cad:GALFF)*  
364 (28), and the FRET tension sensor line, *TgBAC(ve-cad:ve-cadTS)uq11bh* (23).

365

366 *C. neoformans* culture

367 The *C. neoformans* variety *grubii* strain KN99, its GFP-expressing derivative KN99:GFP  
368 and mCherry-expressing derivative KN99:mCherry were used in this study (39) . We  
369 used GFP expressing  $\Delta plb1-H99$ ,  $\Delta lac1-H99$  or parental *H99-GFP* (27) and  $\Delta gsc$ ,  $\Delta smt$ ,  
370  $\Delta sld8$  and parental strain (24). Cultures were grown in 2 ml of yeast extract peptone  
371 dextrose (YPD) (all reagents are from Sigma-Aldrich, Poole, UK unless otherwise stated)  
372 inoculated from YPD agar plates and grown for 18 hours at 28°C, rotating horizontally  
373 at 200 rpm. Cryptococcal cells were collected from 1ml of the culture, pelleted at 3300 g  
374 for 1 minute.

375 To count cryptococcal cells, the pellet was re-suspended in 1 ml PBS and cells were  
376 counted with a haemocytometer. Cryptococcal cells were pelleted again (3300g) and re-  
377 suspended in autoclaved 10% Polyvinylpyrrolidone (PVP), 0.5% Phenol Red in PBS  
378 (PVP is a polymer that increases the viscosity of the injection fluid and prevents settling of  
379 microbes in the injection needle), ready for micro-injection. The volume of PVP in Phenol  
380 red cryptococcal cells were re-suspended was calculated to give the required inoculum  
381 concentration.

382 Zebrafish microinjection

383 An established zebrafish *C. neoformans* micro-injection protocol was followed (Bojarczuk  
384 et al., 2016). Zebrafish larvae were injected at 2 days post fertilisation (dpf) and  
385 monitored until a maximum of 10dpf. Larvae were anaesthetised by immersion in  
386 0.168 mg/mL tricaine in E3 and transferred onto 3% methyl cellulose in E3 for injection.  
387 1nl of cryptococcal cells, where 1nl contained 25cfu, 200cfu or 1000cfu, was injected into  
388 the yolk sac circulation valley. For micro-injection of GFP fluorescent beads (Fluoresbrite®  
389 YG Carboxylate Microspheres 4.50µm). The bead stock solution was pelleted at 78g for 3

390 minutes, and re-suspended in PVP in phenol red as above for the required concentration.  
391 Micro-injection of 40kDa FITC-dextran (Sigma-Aldrich) at 3dpf in a 50:50 dilution in PVP  
392 in phenol red, injected 1nl into the duct of Cuvier. Larvae were transferred to fresh E3 to  
393 recover from anaesthetic. Any zebrafish injured by the needle/micro-injection, or where  
394 infection was not visually confirmed with the presence of Phenol Red, were removed from  
395 the procedure. Zebrafish were maintained at 28°C.

#### 396 Microscopy of infected zebrafish

397 Larvae were anaesthetized 0.168 mg/mL tricaine in E3 and mounted in 0.8% low melting  
398 agarose onto glass bottom microwell dishes (MatTek P35G-1.5-14C). For low *C.*  
399 *neoformans* dose infection time points, confocal imaging was completed on a Zeiss LSM700  
400 AxioObserver, with an EC Plan-Neofluar 10x/0.30 M27 objective. Three biological repeats  
401 contained 7, 10 and 12 infected zebrafish. Larvae were imaged in three positions to cover  
402 the entire larvae (head, trunk and tail) at 2hpi, and at subsequent 24 hour intervals. After  
403 each imaging session, larvae were recovered into fresh E3 and returned to a 96-well  
404 plate.

405 A custom-build wide-field microscope was used for imaging transgenic zebrafish lines blood  
406 vessel integrity after infection with *C. neoformans*. Nikon Ti-E with a CFI Plan Apochromat  
407  $\lambda$  10X, N.A.0.45 objective lens, a custom built 500  $\mu$ m Piezo Z-stage (Mad City Labs,  
408 Madison, WI, USA) and using Intensilight fluorescent illumination with ET/sputtered series  
409 fluorescent filters 49002 and 49008 (Chroma, Bellow Falls, VT, USA). Images were  
410 captured with Neo sCMOS, 2560 x 2160 Format, 16.6 mm x 14.0 mm Sensor Size,  
411 6.5  $\mu$ m pixel size camera (Andor, Belfast, UK) and NIS-Elements (Nikon, Richmond,  
412 UK). Settings for *Tg(kdrl:mCherry)* and *TgBAC(ve-cad:GALFF)* crossed to  
413 *Tg(10xUAS:Teal)<sup>uq13bh</sup>* GFP, filter 49002, 50 ms exposure, gain 4; mCherry, filter 49008,  
414 50 ms exposure, gain 4. Settings for the GFP fluorescent beads were altered for GFP  
415 alone, filter 49002, 0.5 ms exposure, gain 4. In all cases a 50um z-stack section was



416 imaged with 5um slices. Larvae were imaged at 2hpi, and at subsequent 24 hour intervals.  
417 After each imaging session, larvae were recovered into fresh E3 and returned to a 96-well  
418 plate.

419 Co-injection of 40KDa FITC dextran with cryptococcal cells for imaging of vasculature in  
420 the brain was completed on 3dpf immediately after dextran injection, using a Ziess Z1  
421 light sheet obtained using Zen software. A W-Plan-apochromat 20x/1. UV-Vis lense was  
422 used to obtain z-stack images using the 488nm and 561nm lasers and a LP560 dichroic  
423 beam splitter.

424 Time-lapse microscopy of infected zebrafish

425 For time-lapse imaging of low *C.neoformans* dose infection, larvae were anaesthetised and  
426 mounted as described above, with the addition of E3 containing 0.168mg/mL tricaine  
427 over-laid on top of the mounted *Nacre* larvae. Images were captured on the custom-build  
428 wide-field microscope (as above), with CFI Plan Apochromat  $\lambda$  10X, N.A.0.45 objective  
429 lens, using the settings; GFP, filter 49002, 50ms exposure, gain 4; mCherry, filter  
430 49008, 50ms exposure, gain 4. Images were acquired with no delay (~0.6 seconds) for  
431 1 hour, starting <2mins after infection.

432 FRET microscopy and analysis

433 The FRET tension sensor line, *TgBAC(ve-cad:ve-cadTS)uq11bh* larvae were infected with  
434 mCherry *C. neoformans* and mounted for imaging, as above. A spinning disc confocal  
435 microscope, UltraVIEW VoX spinning disk confocal microscope (Perkin Elmer, Cambridge,  
436 UK). A 40x oil lense (UplanSApo 40x oil (NA 1.3)) was used for imaging. TxRed, excitation  
437 561nm with 525/640nm emission filter, CFP, excitation 440nm with 485nm emission filter,  
438 YFP, excitation 514nm with 587nm emission filter, and FRET excitation 440nm with 587nm  
439 emission filter were used as well as bright field images. All were acquired using a

440 Hamamatsu C9100-50 EM-CCD camera. Volocity software was used. Analysis of images  
441 was completed using ImageJ software. The fluorescence signal intensity of the FRET, CFP  
442 and YFP channels was measured at each side of a vessel. This was completed at the  
443 location of a cryptococcal mass, or if no mass was present the middle of the vessel was  
444 measured. The FRET signal was then divided by the YFP signal, and an average was  
445 taken per vessel.

#### 446 Image analysis

447 Image analysis performed to measure the size of cryptococcal masses, and blood vessel  
448 width was completed using NIS elements. Fluorescence intensity of GFP and mCherry *C.*  
449 *neoformans* for low infection analysis was calculated using ImageJ software.

#### 450 Statistical analysis

451 Statistical analysis was performed as described in the results and figure legends. We  
452 used Graph Pad Prism 6-8 for statistical tests and plots.

#### 453 **Author contributions**

454 JFG, SAJ, PWI and SAR conceived of the study and designed the experiments.  
455 JFG, RJE, AB, AK, SAJ and RH performed experiments. JFG, RJE, AB, AK, RH and SAJ  
456 analysed data. AKL and BMH provided unpublished reagents and technical advice. JFG  
457 and SAJ prepared the manuscript with input from SAR and PWI. All authors commented  
458 on and edited the manuscript.

459

#### 460 **Acknowledgments**

461 We thank Timothy Chico (University of Sheffield, UK) and Robert Wilkinson (University of  
462 Sheffield, UK) for help and advice on vascular biology and Mike Tomlinson (University of

463 Birmingham) for help and advice on ADAM regulation of VE-Cadherin. We thank Arturo  
464 Casadevall (Johns Hopkins University, Maryland USA) for providing the 18B7  
465 antibody and Maurizio Del Poeta for providing *Cryptococcus* ceramide pathway  
466 mutants. JFG was supported by an award from the Singapore A\*STAR Research  
467 Attachment Programme (ARAP) in partnership with the University of Sheffield. Work in the  
468 PWI lab was funded by the A\*STAR Institute of Molecular and Cell Biology (IMCB) and the  
469 Lee Kong Chian School of Medicine. RJE was supported by a British Infection Association  
470 postdoctoral fellowship (<https://www.britishinfection.org/>). AKL was supported by a University  
471 of Queensland Postdoctoral Fellowship. BMH by an NHMRC/National Heart Foundation  
472 Career Development Fellowship (1083811). SAJ, AB, RJE, AK and RH, were supported by  
473 Medical Research Council and Department for International Development Career  
474 Development Award Fellowship MR/J009156/1 (<http://www.mrc.ac.uk/>). SAJ was  
475 additionally supported by a Krebs Institute Fellowship  
476 (<http://krebsinstitute.group.shef.ac.uk/>), and Medical Research Council Centre grant  
477 (G0700091). RJE was supported by a British Infection Association postdoctoral fellowship.  
478 AK was supported by a Wellcome Trust Strategic Award in Medical Mycology and Fungal  
479 Immunology (097377/Z/11/Z). SAR was supported by a Medical Research Council  
480 Programme Grant (MR/M004864/1). Light sheet microscopy was carried out in the Wolfson  
481 Light Microscopy Facility, supported by a BBSRC ALERT14 award for light-sheet  
482 microscopy (BB/M012522/1). We thank aquarium staff at the Bateson Centre (Sheffield)  
483 and the IMCB (Singapore) for zebrafish husbandry.

#### 484 **References**

- 485 1. Coureuil M, Join-Lambert O, Lécuyer H, Bourdoulous S, Marullo S, Nassif X.  
486 Pathogenesis of meningococemia. *Cold Spring Harb Perspect Med*. 2013 Jun 1;3(6).
- 487 2. Liu W, Li C, Liu X, Xu Z, Kong L. Case of Subarachnoid Hemorrhage Caused by  
488 Tuberculous Aneurysm. *World Neurosurg*. 2018 Feb 1;110:73–8.

- 489 3. Walsh TJ, Hier DB, Caplan LR. Aspergillosis of the central nervous system:  
490 Clinicopathological analysis of 17 patients. *Ann Neurol*. 1985 Nov 1;18(5):574–82.
- 491 4. Kleinschmidt-Demasters BK, Mazowiecki M, Bonds LA, Cohn DL, Wilson ML.  
492 Coccidioidomycosis Meningitis-Kleinschmidt-DeMasters et al. Vol. 124, *Arch Pathol*  
493 *Lab Med*. 2000.
- 494 5. Takeda S, Wakabayashi K, Yamazaki K, Miyakawa T, Arai H. Intracranial fungal  
495 aneurysm caused by *Candida* endocarditis. *Clin Neuropathol*. 1998;17(4):199–203.
- 496 6. Rajasingham R, Smith RM, Park BJ, Jarvis JN, Govender NP, Chiller TM, et al.  
497 Global burden of disease of HIV-associated cryptococcal meningitis: an updated  
498 analysis. *Lancet Infect Dis*. 2017;
- 499 7. Shi M, Li SS, Zheng C, Jones GJ, Kim KS, Zhou H, et al. Real-time imaging of  
500 trapping and urease-dependent transmigration of *Cryptococcus neoformans* in mouse  
501 brain. *J Clin Invest*. 2010 May 3;120(5):1683–93.
- 502 8. Santiago-Tirado FH, Onken MD, Cooper JA, Klein RS, Doering TL. Trojan Horse  
503 Transit Contributes to Blood-Brain Barrier Crossing of a Eukaryotic Pathogen. *MBio*.  
504 2017 Jan 31;8(1).
- 505 9. Charlier C, Nielsen K, Daou S, Brigitte M, Chretien F, Dromer F. Evidence of a Role  
506 for Monocytes in Dissemination and Brain Invasion by *Cryptococcus neoformans*.  
507 *Infect Immun*. 2009 Jan 1;77(1):120–7.
- 508 10. Sorrell TC, Juillard PG, Djordjevic JT, Kaufman-Francis K, Dietmann A, Milonig A, et  
509 al. Cryptococcal transmigration across a model brain blood-barrier: Evidence of the  
510 Trojan horse mechanism and differences between *Cryptococcus neoformans* var.  
511 *grubii* strain H99 and *Cryptococcus gattii* strain R265. *Microbes Infect*. 2016 Jan  
512 1;18(1):57–67.
- 513 11. Gilbert AS, Seoane PI, Sephton-Clark P, Bojarczuk A, Hotham R, Giurisato E, et al.

- 514 Vomocytosis of live pathogens from macrophages is regulated by the atypical MAP  
515 kinase ERK5. *Sci Adv.* 2017 Aug 1;3(8).
- 516 12. Aharon-Peretz J, Kliot D, Finkelstein R, Ben Hayun R, Yarnitsky D, Goldsher D.  
517 Cryptococcal meningitis mimicking vascular dementia. *Neurology.* 2004 Jun  
518 8;62(11):2135.
- 519 13. Leite AGB, Vidal JE, Bonasser Filho F, Schiavon Nogueira R, César Penalva de  
520 Oliveira A. Cerebral Infarction Related to Cryptococcal Meningitis in an HIV-Infected  
521 Patient: Case Report and Literature Review. *www.bjid.com.br BJID Brazilian J Infect*  
522 *Dis.* 2004;88(2):175–9.
- 523 14. Rosario M, Song SX, McCullough LD. An unusual case of stroke. *Neurologist.* 2012  
524 Jul;18(4):229–32.
- 525 15. Mishra AK, Arvind VH, Muliylil D, Kuriakose CK, George AA, Karuppusami R, et al.  
526 Cerebrovascular injury in cryptococcal meningitis. *Int J Stroke.* 2017 Apr  
527 19;174749301770624.
- 528 16. Cunha B, Jimada I, Chawla K. Intracranial complications of acute bacterial  
529 endocarditis. *Surg Neurol Int.* 2018;9(1):107.
- 530 17. Bojarczuk A, Miller KA, Hotham R, Lewis A, Ogryzko N V, Kamuyango AA, et al.  
531 *Cryptococcus neoformans* Intracellular Proliferation and Capsule Size Determines  
532 Early Macrophage Control of Infection. *Sci Rep.* 2016 Feb 18;6:21489.
- 533 18. Tenor JL, Oehlers SH, Yang JL, Tobin DM, Perfect JR. Live Imaging of Host-Parasite  
534 Interactions in a Zebrafish Infection Model Reveals Cryptococcal Determinants of  
535 Virulence and Central Nervous System Invasion. *MBio.* 2015 Sep 29;6(5):e01425-15.
- 536 19. Lugo-Hernandez E, Squire A, Hagemann N, Brenzel A, Sardari M, Schlechter J, et al.  
537 3D visualization and quantification of microvessels in the whole ischemic mouse brain  
538 using solvent-based clearing and light sheet microscopy. *J Cereb Blood Flow Metab.*

- 539            2017 Oct 28;37(10):3355–67.
- 540    20.    Schwerte T, Pelster B. Digital motion analysis of the circulatory system. *J Exp Biol.*  
541            2000;203:1659–69.
- 542    21.    Prajsnar TK, Hamilton R, Garcia-Lara J, McVicker G, Williams A, Boots M, et al. A  
543            privileged intraphagocyte niche is responsible for disseminated infection of  
544            *Staphylococcus aureus* in a zebrafish model. *Cell Microbiol.* 2012 Oct;14(10):1600–  
545            19.
- 546    22.    Grant AJ, Restif O, McKinley TJ, Sheppard M, Maskell DJ, Mastroeni P. Modelling  
547            within-Host Spatiotemporal Dynamics of Invasive Bacterial Disease. Relman DA,  
548            editor. *PLoS Biol.* 2008 Apr 8;6(4):e74.
- 549    23.    Lagendijk AK, Gomez GA, Baek S, Hesselson D, Hughes WE, Paterson S, et al. Live  
550            imaging molecular changes in junctional tension upon VE-cadherin in zebrafish. *Nat*  
551            *Commun.* 2017;8(1402).
- 552    24.    Raj S, Nazemidashtarjandi S, Kim J, Joffe L, Zhang X, Singh A, et al. Changes in  
553            glucosylceramide structure affect virulence and membrane biophysical properties of  
554            *Cryptococcus neoformans*. *Biochim Biophys Acta - Biomembr.* 2017 Nov  
555            1;1859(11):2224–33.
- 556    25.    Evans RJ, Li Z, Hughes WS, Djordjevic JT, Nielsen K, May RC. Cryptococcal  
557            Phospholipase B1 Is Required for Intracellular Proliferation and Control of Titan Cell  
558            Morphology during Macrophage Infection. Deepe GS, editor. *Infect Immun.* 2015  
559            Apr;83(4):1296–304.
- 560    26.    Chayakulkeeree M, Johnston SA, Oei JB, Lev S, Williamson PR, Wilson CF, et al.  
561            SEC14 is a specific requirement for secretion of phospholipase B1 and pathogenicity  
562            of *Cryptococcus neoformans*. *Mol Microbiol.* 2011 May;80(4):1088–101.
- 563    27.    Evans RJ, Pline K, Loynes CA, Needs S, Aldrovandi M, Tiefenbach J, et al. 15-keto-

- 564 prostaglandin E2 activates host peroxisome proliferator-activated receptor gamma  
565 (PPAR- $\gamma$ ) to promote *Cryptococcus neoformans* growth during infection. Wheeler RT,  
566 editor. PLOS Pathog. 2019 Mar 28;15(3):e1007597.
- 567 28. Bussmann J, Schulte-Merker S. Rapid BAC selection for tol2-mediated transgenesis  
568 in zebrafish. Development. 2011 Oct 1;138(19):4327–32.
- 569 29. Reyat JS, Chimen M, Noy PJ, Szyroka J, Rainger GE, Tomlinson MG. ADAM10-  
570 Interacting Tetraspanins Tspan5 and Tspan17 Regulate VE-Cadherin Expression and  
571 Promote T Lymphocyte Transmigration. J Immunol Author Choice. 2017;199(2):666.
- 572 30. Lee SC, Dickson DW, Casadevall A. Pathology of cryptococcal meningoencephalitis:  
573 Analysis of 27 patients with pathogenetic implications. Hum Pathol. 1996  
574 Aug;27(8):839–47.
- 575 31. de Souza AL, Sztajn bok J, Seguro AC. Cerebellar hemorrhage as an atypical  
576 complication of meningococcal meningitis. Int J Infect Dis. 2008 Sep 1;12(5):558–9.
- 577 32. Kleinfeld K, Jones P, Riebau D, Beck A, Paueksakon P, Abel T, et al. Vascular  
578 complications of fungal meningitis attributed to injections of contaminated  
579 methylprednisolone acetate. JAMA Neurol. 2013 Sep 1;70(9):1173–6.
- 580 33. Pichon N, Ajzenberg D, Desnos-Ollivier M, Clavel M, Gantier JC, Labrousse F. Fatal-  
581 stroke syndrome revealing fungal cerebral vasculitis due to *Arthrographis kalrae* in an  
582 immunocompetent patient. J Clin Microbiol. 2008 Sep 1;46(9):3152–5.
- 583 34. Floret D, Delmas C, Cochat P. Cerebellar infarction as a complication of  
584 pneumococcus meningitis. Pediatr Infect Dis J. 1989;8(1):57.
- 585 35. Lan S, Chang W, Lu C, Lui C, Chang H. Cerebral infarction in chronic meningitis: a  
586 comparison of tuberculous meningitis and cryptococcal meningitis. QJM.  
587 2001;94:247–53.
- 588 36. Rangwala SD, Strickland BA, Rennert RC, Ravina K, Bakhsheshian J, Hurth K, et al.

589 Ruptured Mycotic Aneurysm of the Distal Circulation in a Patient with Mucormycosis  
590 Without Direct Skull Base Extension: Case Report. Oper Neurosurg. 2019 Mar  
591 1;16(3):E101–7.

592 37. Sasaki T, Mineta M, Kobayashi K, Ando M, Obata M. Zygomycotic invasion of the  
593 central nervous system. Jpn J Radiol. 2010 Jun 30;28(5):376–80.

594 38. Nußlein-Volhard C (Christiane), Dahm R. Zebrafish: a practical approach. Oxford  
595 University Press; 2002.

596 39. Gibson RH, Evans RJ, Hotham R, Bojarczuk A, Lewis A, Bielska E, et al.  
597 Mycophenolate mofetil increases susceptibility to opportunistic fungal infection  
598 independent of lymphocytes. bioRxiv. 2018;

599

600

601

602



603 **Figures**

604

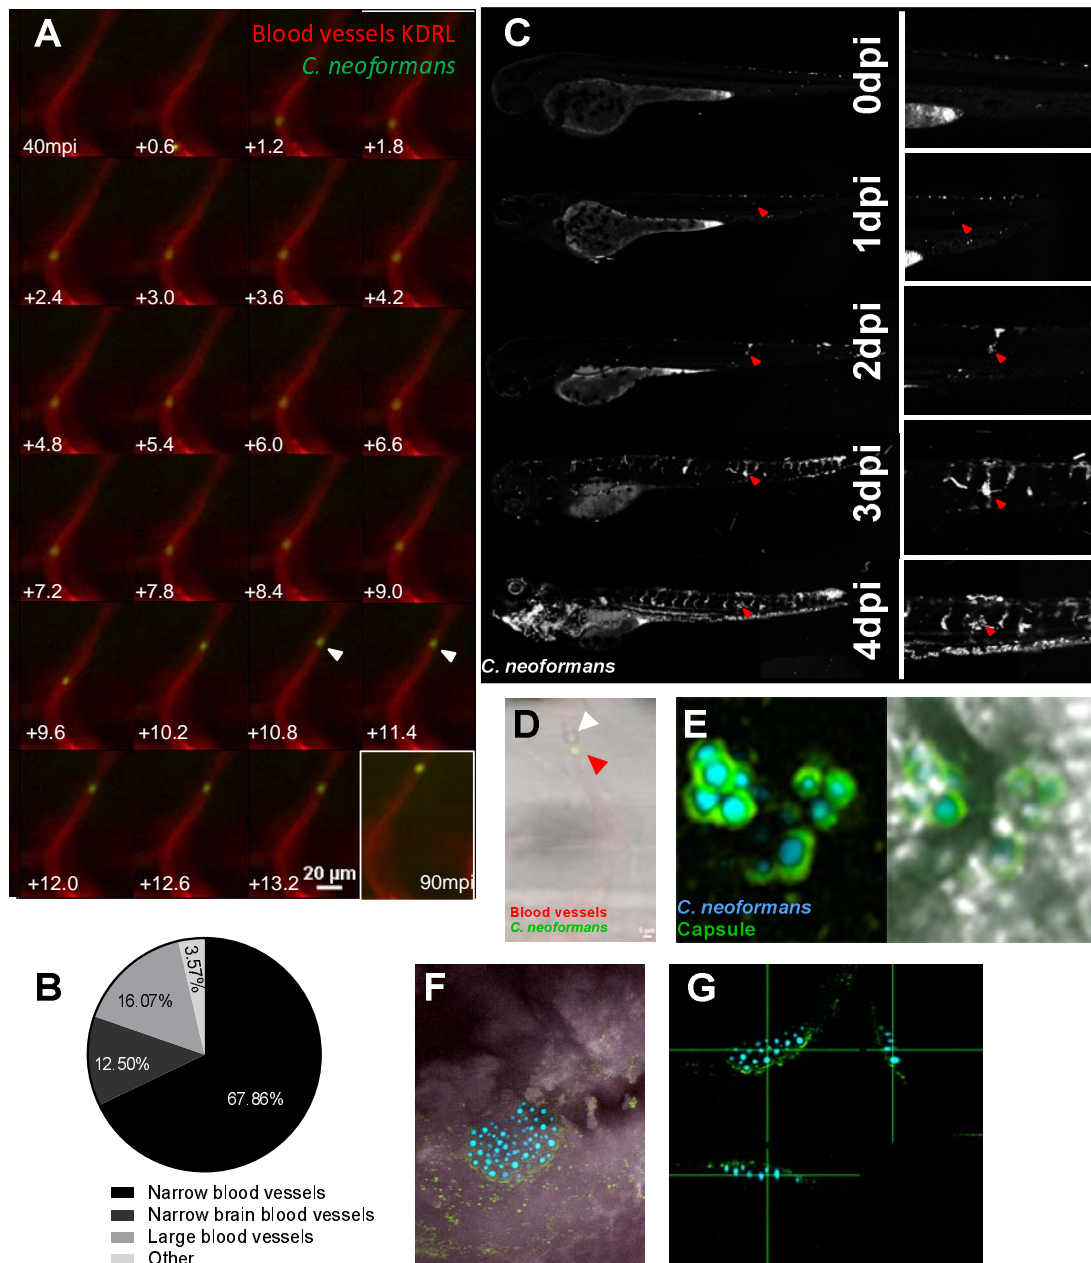

605

606 **Figure 1**

607 **Cryptococcoma formation by cryptococcal cell trapping in small blood vessels in the**

608 **zebrafish**

609 **A** Infection of KDRL mCherry blood marker transgenic line with 25cfu GFP *C. neoformans*,  
610 imaged immediately after infection. A single cryptococcal cell becomes trapped in the  
611 vasculature (white arrow), at 40 minutes post infection (mpi) after moving from the bottom of  
612 the vessel toward the top (left to right, time points +0.6 seconds). Last image shows  
613 cryptococcal cell in the same location at the end of the timelapse at 90mpi **B** Infection of  
614 2dpf AB larvae with 25cfu of a 5:1 ratio of GFP:mCherry KN99 *C. neoformans*. Larvae were  
615 imaged until 8dpf, or death (n=3, in each repeat 7, 10 and 12 larvae were used) Proportion  
616 of cryptococcomas observed in small inter-somal blood vessels, small brain blood vessels,  
617 large caudal vein or in other locations e.g. yolk, (n=3). **C** Infection of 2dpf AB larvae with  
618 25cfu of a 5:1 ratio of GFP:mCherry KN99 *C. neoformans*. Larvae were imaged until 8dpf, or  
619 death (n=3, in each repeat 7, 10 and 12 larvae were used). In this case an mCherry majority  
620 overwhelming infection was reached. Infection progression from 0dpi (day of infection  
621 imaged 2hpi), until 4dpi. Red arrows follows an individual cryptococcoma formation and  
622 ultimate dissemination. **D** Infection of 2dpf AB larvae with 1000/25cfu of a 5:1 ratio of  
623 GFP:mCherry KN99 *C. neoformans* showing blood cells trapped behind a cryptococcal  
624 mass within an inter-segmental vessel. **E-G** GFP KN99 (cyan), antibody labelled  
625 cryptococcal capsule (green). **E** Cryptococci within blood vessels demonstrating the enlarged  
626 capsule blocking the vessel 24 hpi **F-G** Cryptococcal mass encased in capsule. **F**. Merged  
627 florescence and transmitted light z projection **G** Three-dimensional section of cryptococcal  
628 mass showing encasement in polysaccharide capsule.

629

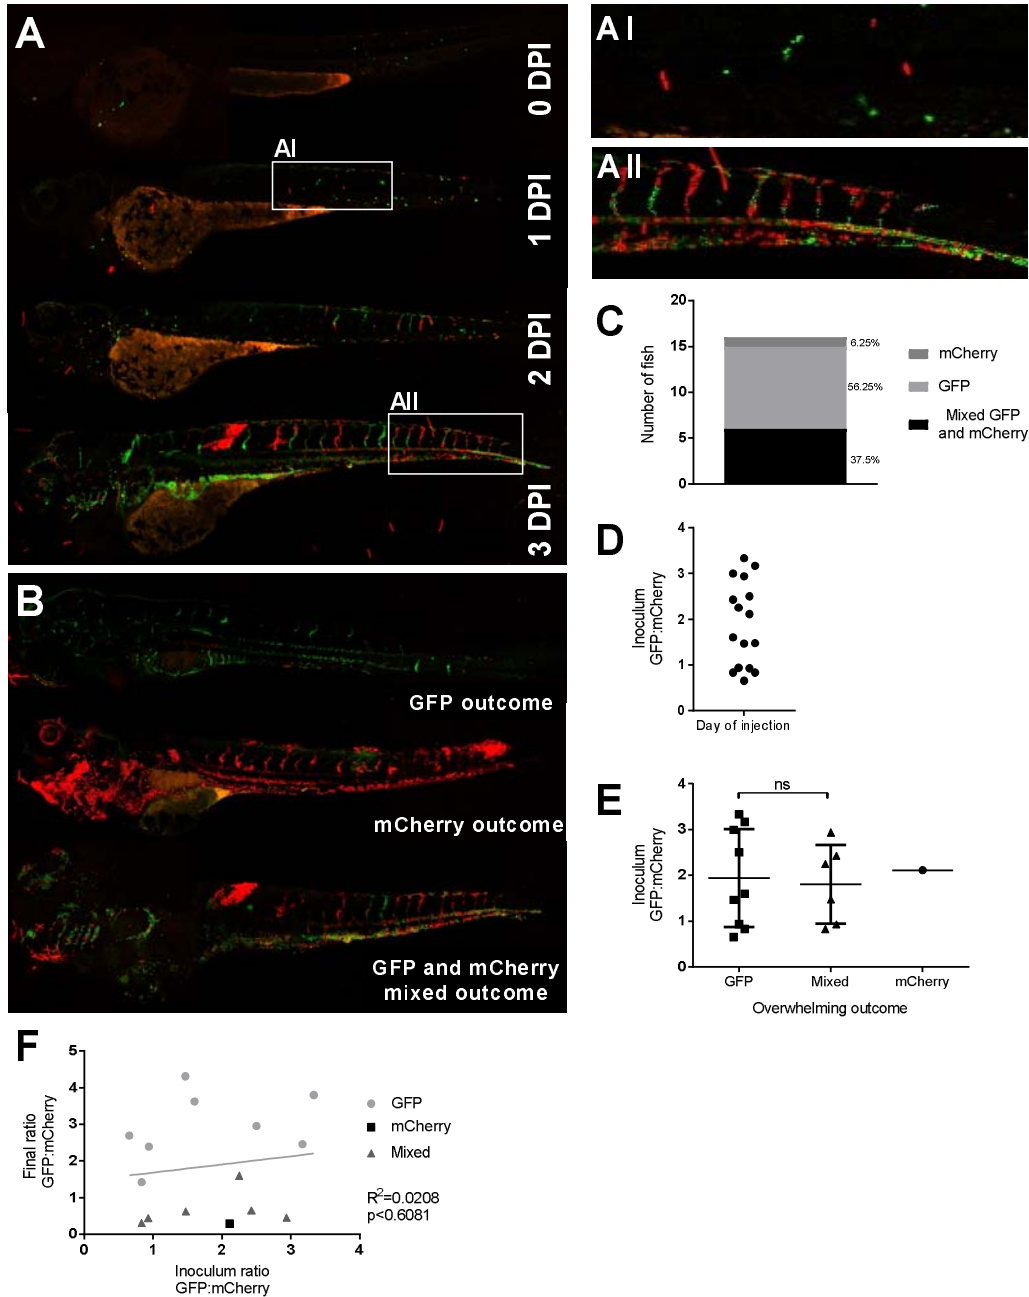

630

631 **Figure 2**

632 **Inoculum does not predict infection outcome**

633 Infection of 2dpf AB larvae with 25cfu of a 5:1 ratio of GFP:mCherry KN99 *C. neoformans*.

634 Larvae were imaged until 8dpf, or death (n=3, in each repeat 7, 10 and 12 larvae were used)

635 **A** Infection of AB wild-type larvae with 5:1 ratio of GFP:mCherry KN99 *C. neoformans*, at

636 0dpi, 1dpi, 2dpi and 3dpi **A I** Formation of cryptococcal masses at 1dpi **A II** Final infection  
637 outcome **B** Infection of 2dpf AB larvae with 25cfu of a 5:1 ratio of GFP:mCherry KN99 *C.*  
638 *neoformans*. Larvae were imaged until 8dpf, or death (n=3, in each repeat 7, 10 and 12  
639 larvae were used). A GFP majority infection outcome, mCherry infection outcome or a Mixed  
640 GFP and mCherry infection outcome (n=3, 16 larvae) **C** Proportion of each overwhelming  
641 infection outcome observed, GFP, mCherry or mixed **D** Range of GFP:mCherry *C.*  
642 *neoformans* injected into larvae at 2hpi **E** Actual injected GFP:mCherry ratios for each  
643 overwhelming outcome (n=3, +/- SEM, Man-Whitney t-test ns=not significant) **F** Inoculum  
644 ratio of GFP:mCherry, against final GFP:mCherry ratio at overwhelming infection stage  
645 (Linear regression  $R^2=0.0208$ ,  $p<0.6081$ , n=3, 16 larvae)

646

647

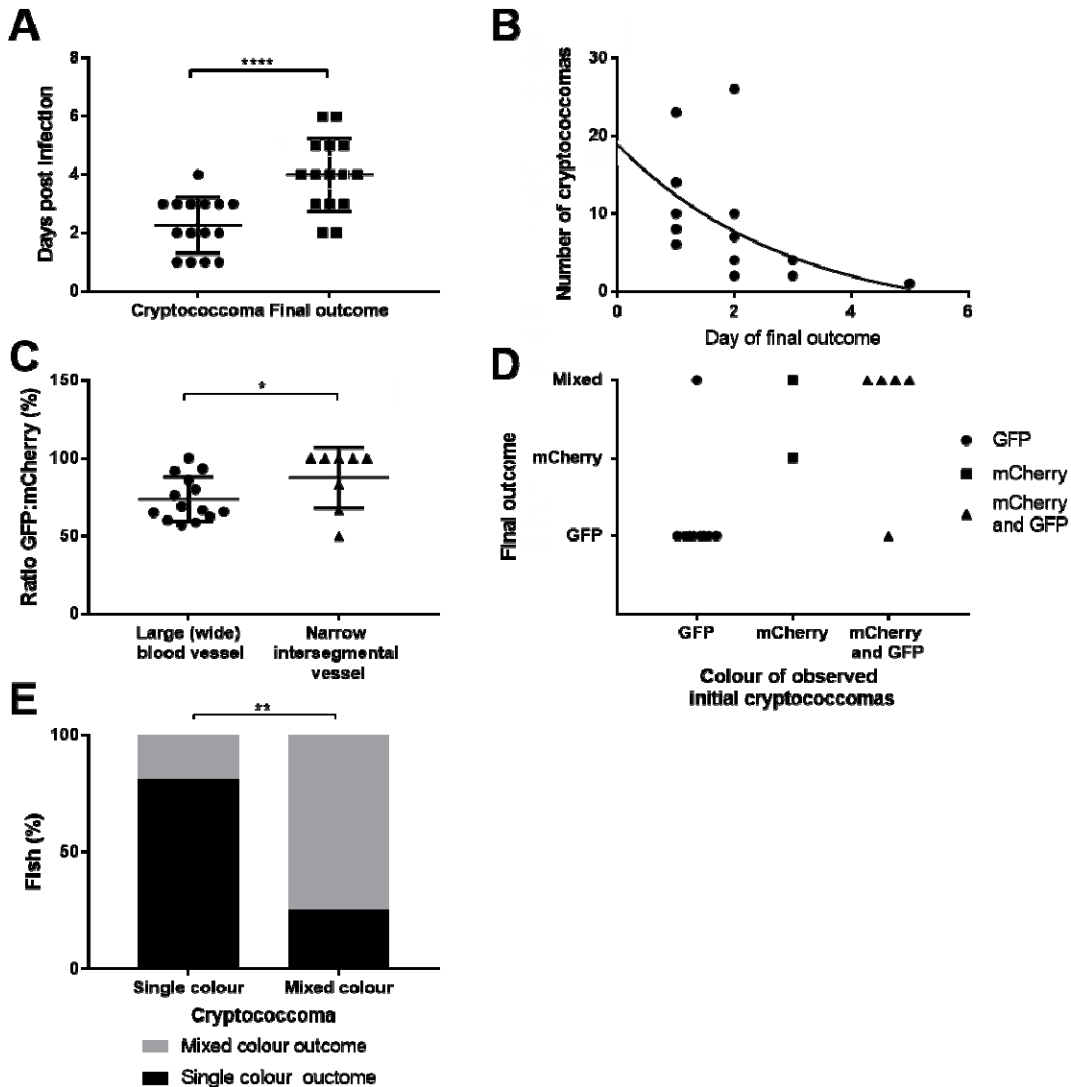

648

649 **Figure 3**

650 **Cryptococcoma formation leads to uncontrolled infection**

651 Infection of 2dpf AB larvae with 25cfu of a 5:1 ratio of GFP:mCherry KN99 *C. neoformans*.

652 Larvae were imaged until 8dpf, or death (n=3, in each repeat 7, 10 and 12 larvae were used)

653 **A** Time cryptococcoma first observed and time of final outcome observed (n=3, +/- SEM,

654 Wilcoxon matched pairs test, \*\*\*\*p<0.0001) **B** The number of cryptococcomas observed

655 within individual larvae and how many days after observation final overwhelming infection

656 was reached (n=3, non-linear regression, one-phase decay) **C** The ratio of GFP:mCherry

657 *C. neoformans* in the large caudal vein in comparison to the fifth inter-somal blood vessel, at  
 658 uncontrolled infection time point (n=3, \*p<0.05, +/-SEM, paired t-test). **D** Comparison of the  
 659 colour (either GFP, mCherry or mixed) of *C. neoformans* in cryptococcomas, in relation to  
 660 the final outcome majority *C. neoformans* colour **E** Comparison of the colour of  
 661 cryptococcomas, either single colour or mixed, with the colour of final outcome (n=3,  
 662 \*\*p<0.01, Fischer's exact test)  
 663

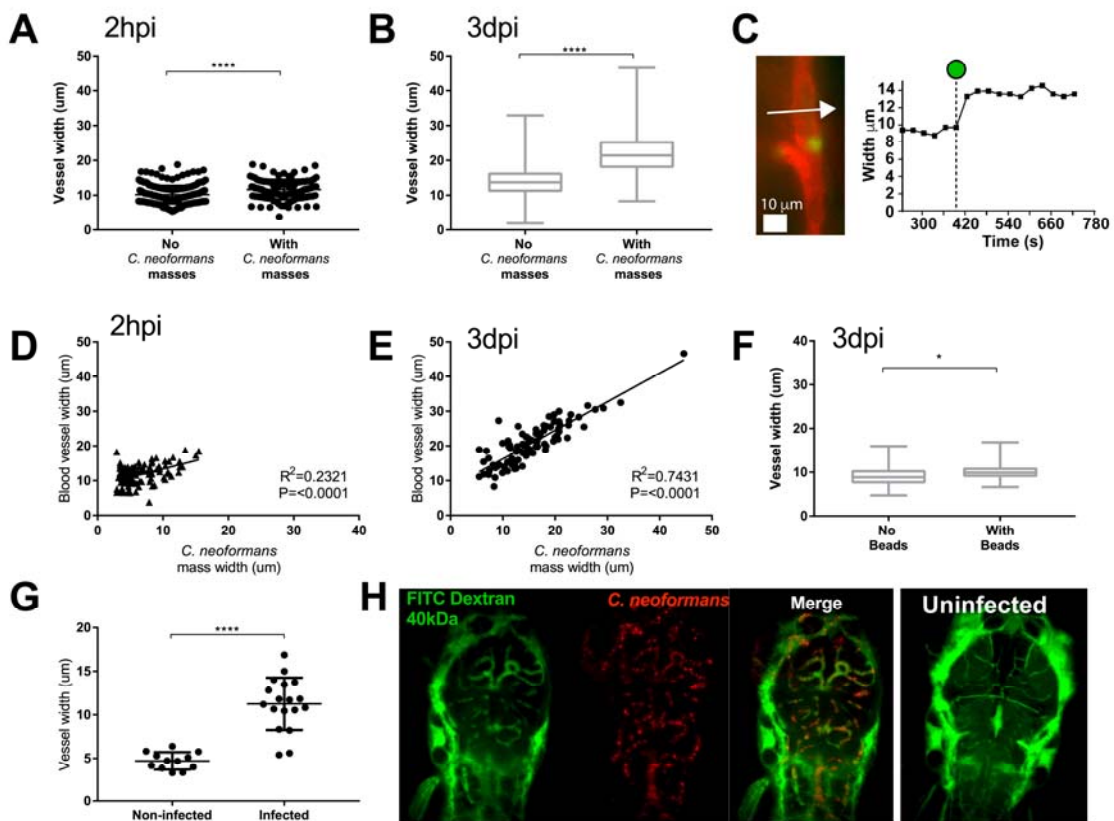

664

665 **Figure 4**

666 **Localised clonal expansion proportionally increases vasculature size**

667 **A-E** :Infection of KDRL mCherry blood marker transgenic line with 1000cfu GFP *C.*  
 668 *neoformans* or inert beads **A** Vessel width with and without cryptococcal masses at 2hpi  
 669 (n=3, +/- SEM, \*\*\*\*p<0.0001, unpaired t-test) **B** Vessel width with and without cryptococcal  
 670 masses at 3dpi (n=3, +/- SEM, \*\*\*\*p<0.0001, unpaired t-test) **C** Left panel - Image from a

671 time lapse movie of KDRL mCherry zebrafish larvae showing a blood vessel (red) in the  
 672 zebrafish brain and a *C. neoformans* cell (green). Right panel - Kymograph showing the  
 673 change in diameter of the blood vessel measured at the point indicated by the white arrow in  
 674 Ci, at each frame in the time lapse. The dotted line on the x axis indicates the timepoint  
 675 where the *Cryptococcus* cell becomes stuck at the point of measurement (white arrow). **D**  
 676 Relationship between *C. neoformans* mass and vessel width at 2hpi (n=3, linear regression)  
 677 **E** Relationship between *C. neoformans* mass and vessel width at 3dpi (n=3, linear  
 678 regression) **F** Vessel width with and without beads present at 3dpi (n=3, +/- SEM, \*p<0.05,  
 679 unpaired t-test). **G-H**: Inoculation of mCherry *C. neoformans* with 40kDa FITC Dextran to  
 680 mark blood vessels **G** Comparison of infected brain vessels width to non-infected  
 681 corresponding brain vessels (three infected fish analysed, +/- SEM, \*\*\*\*p<0.0001, paired t-  
 682 test) **H** Example image of infected and non-infected brain vessels.

683

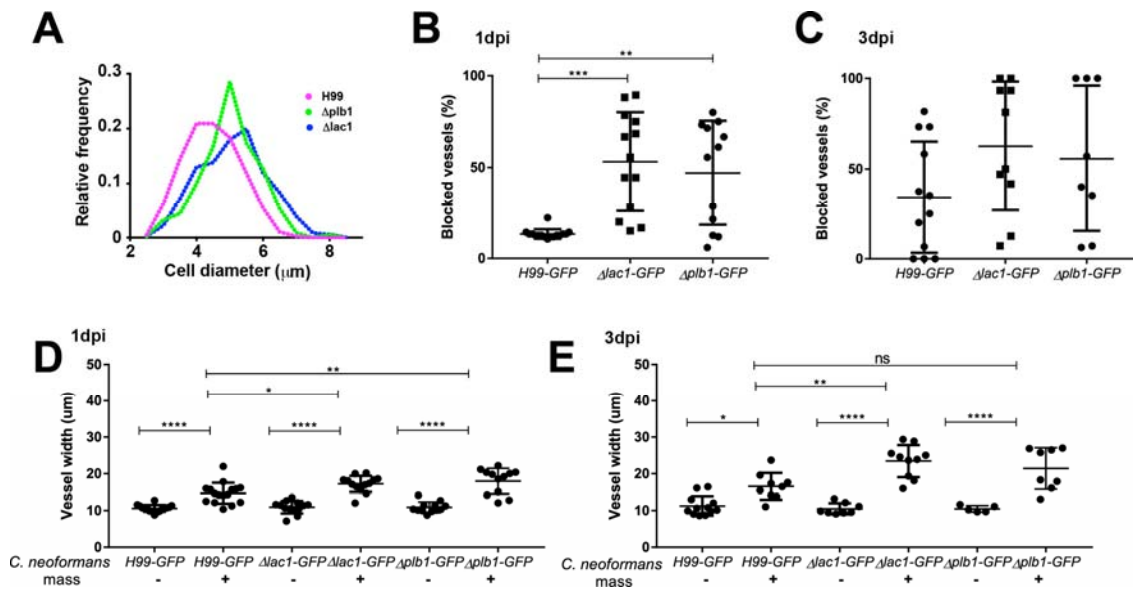

684

685 **Figure 5**

686 **Cryptococcal cell size influences the frequency of trapping within blood vessels**

687 **A-E**: Infection of KDRL mCherry blood marker transgenic line with 1000cfu  $\Delta\text{plb1-H99}$ ,  
 688  $\Delta\text{lac1-H99}$  or parental *H99-GFP C. neoformans* **A** Size of cryptococcal cells injected into

689 zebrafish larvae on the day of infection (>300 cryptococcal cells measured per strain) **B**  
690 Blocked vessels (% of inter-segmental vessels) at 1dpi (n=2, +/- SD, \*\*p<0.01, Kruskal-  
691 Wallis test) **C** Blocked vessels (% of inter-segmental vessels) at 3dpi (n=2, +/- SD, Kruskal-  
692 Wallis test) **D** Vessel width with or without *C. neoformans* at 1dpi (n=2, +/- SD, ns=not  
693 significant, \*\*p<0.01, \*\*\*\*p<0.0001, Kruskal-Wallis test) **E** Vessel width with or without *C.*  
694 *neoformans* at 3dpi (n=2, +/- SD, ns=not significant, \*p<0.05, \*\*\*\*p<0.0001, Kruskal-Wallis  
695 test)  
696  
697



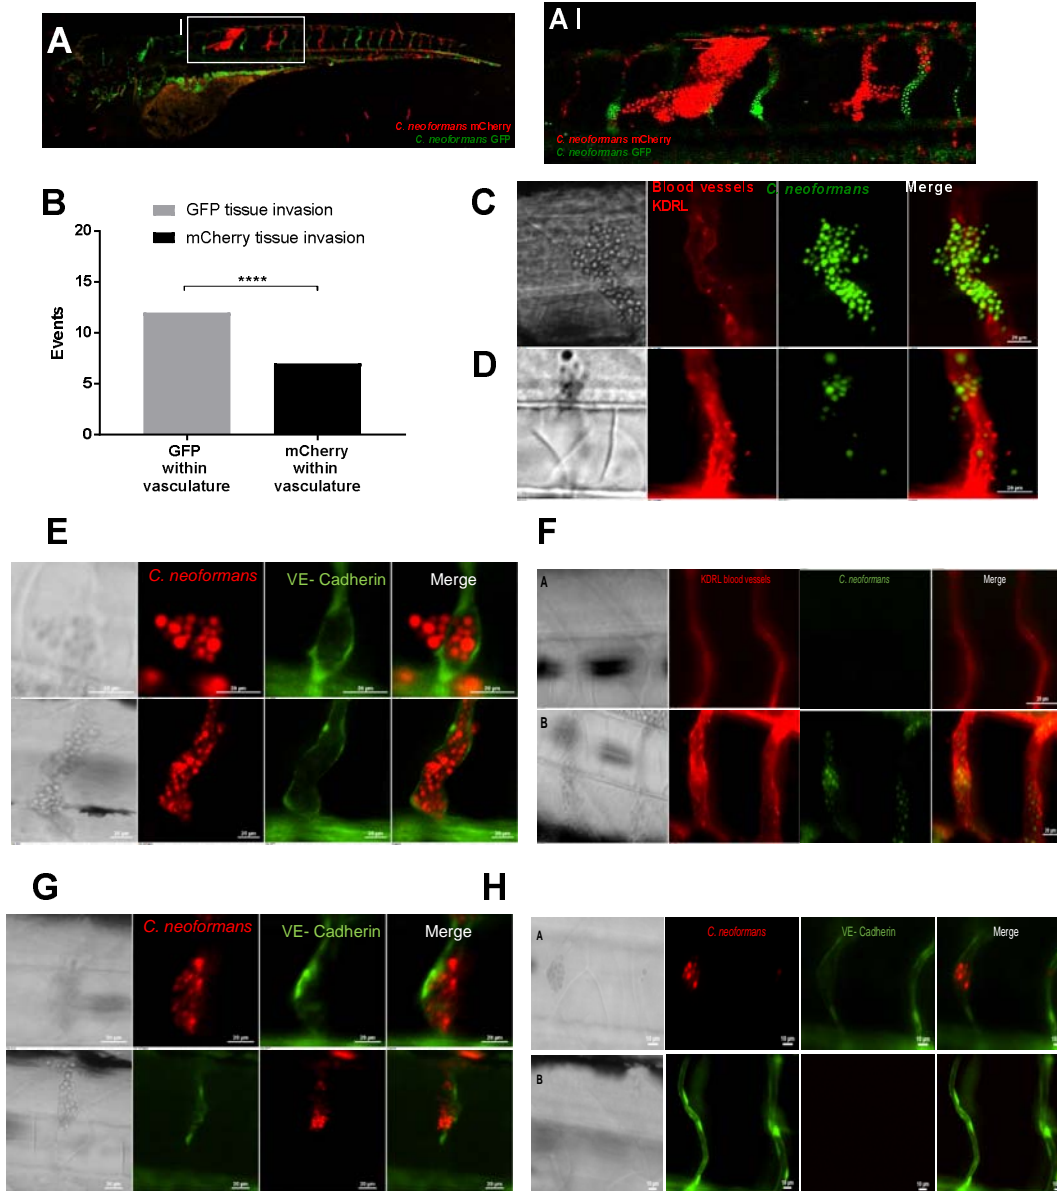

698

699 **Figure 6**

700 **Dissemination events through vasculature damage**

701 **A-B** Infection of 2dpf AB larvae with 25cfu of a 5:1 ratio of GFP:mCherry KN99 *C.*  
 702 *neoformans*. Larvae were serially imaged until 8dpf, or death **A-AI** Example of  
 703 dissemination of *C. neoformans* (mCherry) into the somite surrounding an existing mCherry  
 704 cryptococcoma **B** Comparison of colour of *C. neoformans* in the vasculature (GFP or  
 705 mCherry), and the corresponding colour of dissemination events at the same location **C, D**

706 **and F** Infection of KDRL mCherry blood marker transgenic line at 2dpf with 1000cfu GFP *C.*  
 707 *neoformans* **C** Dissemination from an intact blood vessel, with *C. neoformans* in the  
 708 surrounding tissue suggested to be transcytosis **D** Damaged blood vessels with *C.*  
 709 *neoformans* in surrounding tissue **E,G and H** Infection of vascular-endothelium cadherin  
 710 GFP tight junction (blood vessel marker) transgenic line with 1000cfu mCherry *C.*  
 711 *neoformans* **E** Intact tight junctions in the blood vessel endothelial layer, with *C. neoformans*  
 712 in the surrounding tissue **F** Intact blood vessels (KDRL marker) with or without *C.*  
 713 *neoformans* **G** Damaged tight junctions in the blood vessel endothelial layer **H** Intact blood  
 714 vessels (KDRL marker) with or without *C. neoformans*

715

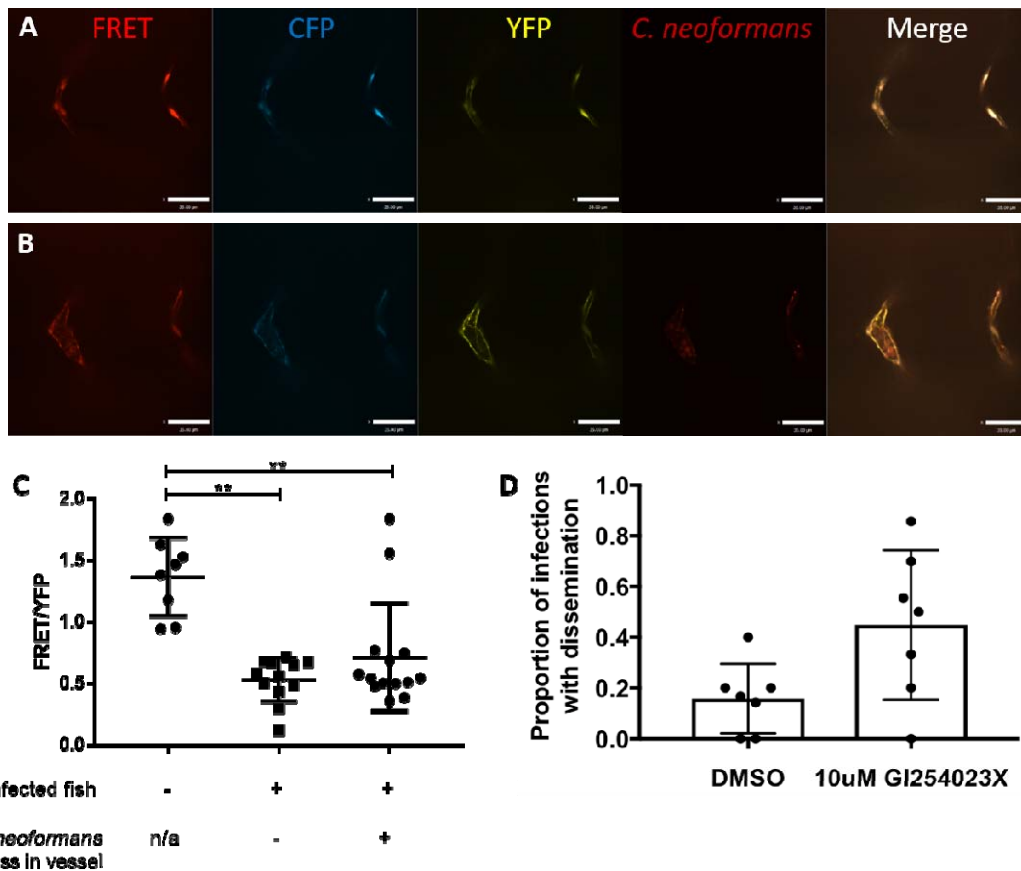

716

717 **Figure 7**

718 **Cryptococcal infection leads to increased tension across VE-cadherin**

719 **A-C** Infection of FRET tension reporter (VE-cadherin-TS) transgenic zebrafish line with  
720 1000cfu mCherry *C. neoformans* **A** images of non-infected control vessels **B** Image showing  
721 infected fish, vessel containing a mass (left) and a vessel without a mass (right) **C**  
722 FRETanalysis of infected fish with or without masses and non-infected controls larvae (n=2,  
723 4-7 larvae per repeat, +/- SD, \*\*p<0.01, Kruskal-Wallis test, where vessel fluorescence was  
724 measured at each side of vessel) **D** Proportion of infected fish with disseminated infection. 7  
725 repeats, 10 zebrafish larvae per repeat per group. P=0.036 unpaired t-test.

726

727

728

729

730

731

732

733

734

735

736

737

738

739

740

741

742

743 **Supplemental figures**

744

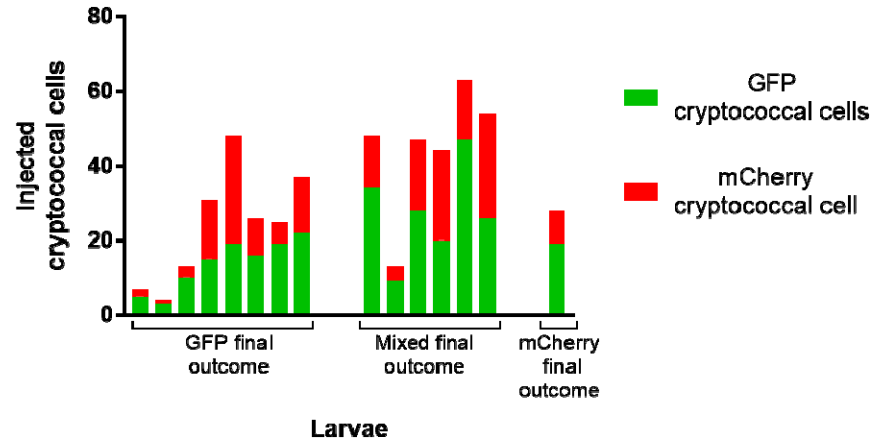

745

746 **Figure S1**

747 **Injected ratio and number does not determine uncontrolled infection.**

748 Infection of AB wild-type larvae with 5:1 ratio of GFP:mCherry KN99 *C. neoformans*, actual  
749 number of cryptococcal cells, both GFP and mCherry KN99 in 25cfu injected grouped by  
750 majority colour outcome. Each bar represents an individual fish.

751

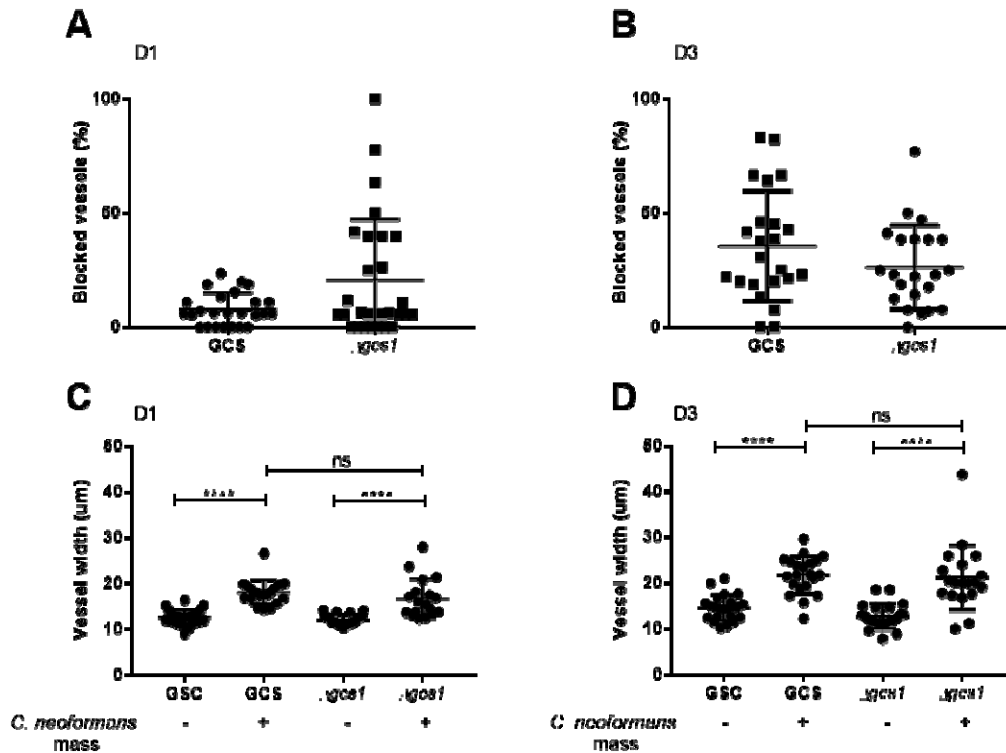

752

753 **Figure S2**

754 **Δgsc does not affect blood vessel widening or frequency of trapping**

755 **A-D:** Infection of KDRL mCherry blood marker transgenic line with 1000cfu Δgsc or its  
756 parental strain *C. neoformans* **A** Blocked vessels (%) at 1dpi (n=2, +/- SD, Kruskal-Wallis  
757 test) **B** Blocked vessels (%) at 3dpi (n=2, +/- SD, Kruskal-Wallis test) **C** Vessel width with or  
758 without *C. neoformans* at 1dpi (n=2, +/- SD, ns=not significant, \*\*\*\*p<0.0001, Kruskal-Wallis  
759 test) **D** Vessel width with or without *C. neoformans* at 3dpi (n=2, +/- SD, ns=not significant,  
760 \*\*\*\*p<0.0001, Kruskal-Wallis test)

761

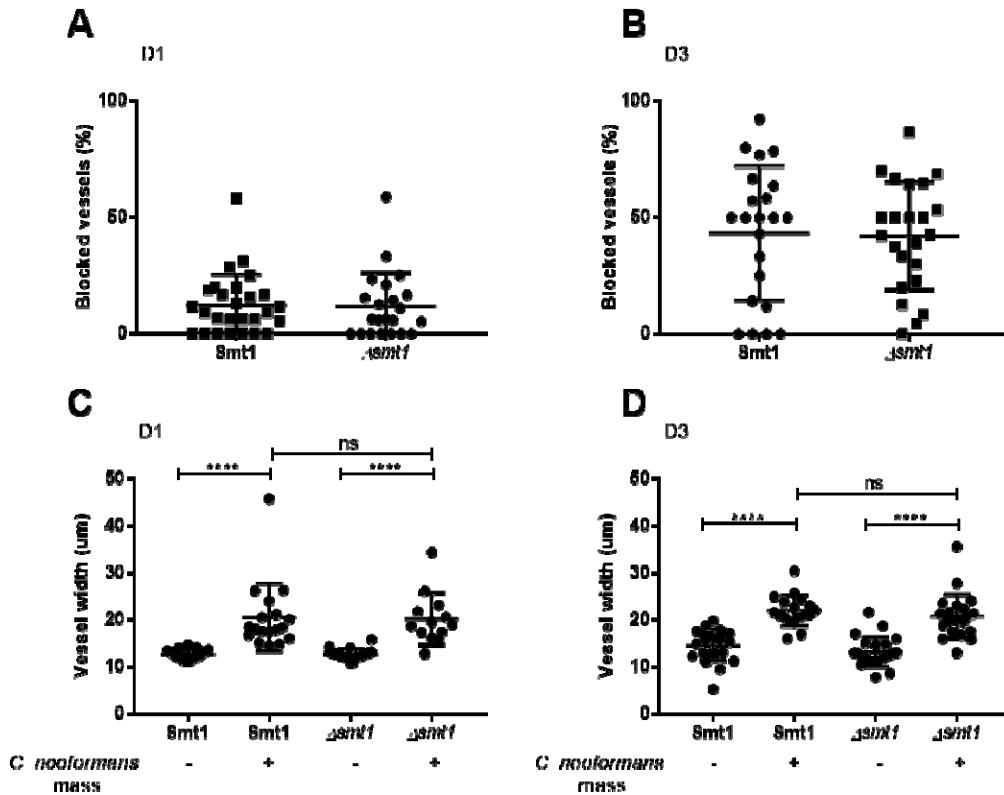

762

763 **Figure S3**

764  **$\Delta smt$  does not affect blood vessel widening or frequency of trapping**

765 **A-D:** Infection of KDRL mCherry blood marker transgenic line with 1000cfu  $\Delta smt$  or its  
766 parental strain *C. neoformans* **A** Blocked vessels (%) at 1dpi (n=2, +/- SD, Kruskal-Wallis  
767 test) **B** Blocked vessels (%) at 3dpi (n=2, +/- SD, Kruskal-Wallis test) **C** Vessel width with or  
768 without *C. neoformans* at 1dpi (n=2, +/- SD, ns=not significant, \*\*\*\*p<0.0001, Kruskal-Wallis  
769 test) **D** Vessel width with or without *C. neoformans* at 3dpi (n=2, +/- SD, ns=not significant,  
770 \*\*\*\*p<0.0001, Kruskal-Wallis test)

771

772

773

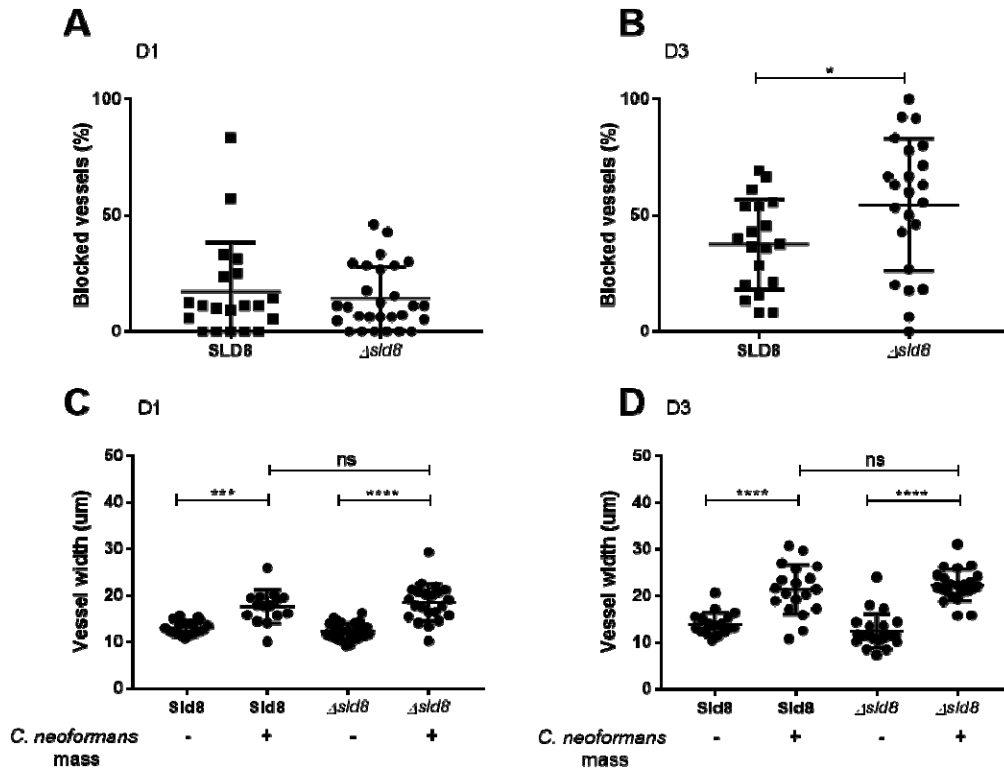

774

775 **Figure S4**

776  **$\Delta sid8$  does not affect blood vessel widening or frequency of trapping**

777 **A-D:** Infection of KDRL mCherry blood marker transgenic line with 1000cfu  $\Delta sid8$  or its  
778 parental strain *C. neoformans* **A** Blocked vessels (%) at 1dpi (n=2, +/- SD, Kruskal-Wallis  
779 test) **B** Blocked vessels (%) at 3dpi (n=2, +/- SD, \*p<0.05, Kruskal-Wallis test) **C** Vessel  
780 width with or without *C. neoformans* at 1dpi (n=2, +/- SD, ns=not significant, \*\*\*\*p<0.0001,  
781 Kruskal-Wallis test) **D** Vessel width with or without *C. neoformans* at 3dpi (n=2, +/- SD,  
782 ns=not significant, \*\*\*\*p<0.0001, Kruskal-Wallis test)
